# Supplementary material
Source: ML conference proceedings conference paper supplement (https://openreview.net/forum?id=UTPBM4dEUS)
Supplement: supplementary_material [file _CORL_2025_SPI-Active-Supp.pdf › _CORL_2025_SPI-Active-Supp.pdf]

# Sampling-Based System Identification with Active Exploration for Legged Robot Sim2Real Learning

Anonymous Author(s)

Affiliation

Address

email

**Abstract:** Sim-to-real discrepancies hinder learning-based policies from achieving high-precision tasks in the real world. While Domain Randomization (DR) is commonly used to bridge this gap, it often relies on heuristics and can lead to overly conservative policies with degrading performance when not properly tuned. System Identification (Sys-ID) offers a targeted approach, but standard techniques rely on differentiable dynamics and/or direct torque measurement, assumptions that rarely hold for contact-rich legged systems. To this end, we present **SPI-Active** (Sampling-based Parameter Identification with Active Exploration), a two-stage framework that estimates physical parameters of legged robots to minimize the sim-to-real gap. **SPI-Active** robustly identifies key physical parameters through massive parallel sampling, minimizing state prediction errors between simulated and real-world trajectories. To further improve the informativeness of collected data, we introduce an active exploration strategy that maximizes the Fisher Information of the collected real-world trajectories via optimizing the input commands of an exploration policy. This targeted exploration leads to accurate identification and better generalization across diverse tasks. Experimental results demonstrate that **SPI-Active** enables precise sim-to-real transfer of learned policies to the real world, outperforming baselines by 42 – 63% in various locomotion tasks. Videos at the anonymous website <https://anonymous-spi-active.github.io/>

**Keywords:** System Identification, Sim2Real, Legged Robots

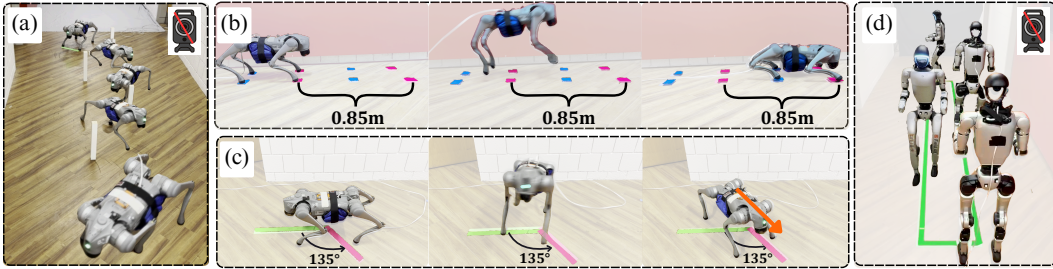

Figure 1: **SPI-Active** enables high-fidelity Sim-to-Real transfer across diverse locomotion tasks. To show the precision, all tasks are open-loop tracking *without global position feedback*. (a) High-Speed Weave Pole Navigation, (b) Precise Forward Jump, (c) Precise Yaw Jump, and (d) Humanoid Precise Velocity Tracking.

## 1 Introduction

Legged robots are envisioned to be used in complex environments where every stride demands a precision that leaves no room for error [1, 2]. Reinforcement Learning (RL) has shown remarkable success in enabling agile motions on both quadruped and humanoid systems [3, 4, 5, 6]. However, transferring RL policies from simulation to hardware remains challenging due to the sim-to-real gap. This gap primarily stems from mismatches in physical parameters such as mass, inertia, friction, and unmodeled effects in actuator dynamics and contact interactions, where even small discrepancies can severely degrade performance in the real world.

29 To bridge this gap, four broad strategies have been developed: (1) **Domain Randomization (DR)**  
 30 trains robust policies by exposing them to wide parameter distributions in simulation [7, 8, 9, 10];  
 31 (2) **“White-Box” System Identification** directly estimates physical parameters using real-world  
 32 data [11, 12, 13]; (3) **“Black-Box” System Identification** learns full or residual dynamics  
 33 model [14, 15, 16] from ground-truth data; and (4) **Adaptive policy learning** adapts or fine-tunes  
 34 policies online using real-world feedback [17, 18]. While practical, DR often requires heuristic tun-  
 35 ing: excessive randomization leads to conservative policies, while insufficient randomization com-  
 36 promises real-world generalization. Approaches in (3) and (4) can be task-specific, prone to overfit-  
 37 ting, and may demand substantial real-world data. In contrast, “White-Box” System Identification  
 38 offers a principled, interpretable, and generalizable approach by estimating physically meaningful  
 39 parameters, making it the focus of this work.

40 Despite its success in classic control, system identification for legged locomotion is challenging  
 41 due to severe non-linearities and intermittent contacts. Many existing methods either assume differ-  
 42 entiable [19] dynamics, rely on specialized sensing such as ground-truth torques [20], or estimate  
 43 only a limited subset of parameters [21, 12], limiting their applicability to general-purpose legged  
 44 systems. Another challenge is collecting sufficiently informative data for accurate estimation. Prior  
 45 approaches often rely on hand-crafted motion scripts, simple repetitive behaviors, or isolated com-  
 46 ponent tests [22, 23, 16]. While effective for subsystems, these fail to capture the coupled hybrid  
 47 dynamics of natural locomotion and require task-specific tuning or extensive data collection.

48 In this work, we present **SPI-Active**, a two-stage, parallelizable, sampling-based framework for iden-  
 49 tifying structured physical parameters of legged robots—without requiring differentiable simulators  
 50 or specialized sensing. In Stage 1, we leverage heuristically designed motion priors of pre-trained  
 51 RL policies to collect real-world trajectories and estimate the robot physical parameters by mini-  
 52 mizing state discrepancy between real and simulated rollouts. To enhance data efficiency and refine  
 53 the initial estimates, Stage 2 draws on principles from optimal experiment design by maximizing  
 54 the Fisher Information of the collected trajectories. Unlike prior work in manipulators [24], direct  
 55 exploration policy training for legged robots can lead to erratic behaviors [25]. We address this by  
 56 introducing a hierarchical active exploration strategy that optimizes command sequences of a multi-  
 57 behavioral RL policy—targeting informative system excitation while ensuring reliable deployment.  
 58 The refined parameters significantly improve sim-to-real transfer, enabling high-precision perfor-  
 59 mance across diverse tasks on both the Unitree Go2 quadruped and the G1 humanoid, including  
 60 challenging tasks (Figure. 1) such as precise jumping, high-speed weave pole traversal, and outper-  
 61 forming baselines by 42 – 63%. In summary, the main contributions are:

- 62 • A parallelized sampling-based system identification framework for legged robots that accounts for  
 63 complex contact dynamics without specialized sensor requirements.
- 64 • An effective active exploration strategy that leverages command-space optimization of a multi-  
 65 behavioural policy to induce highly informative data by maximizing Fisher Information.
- 66 • A comprehensive set of real-world experiments showcasing improvements in sim-to-real transfer  
 67 and precise control in highly dynamic locomotion tasks.

## 68 2 Related Works

### 69 2.1 Domain Randomization and “Black-Box” System Identification for Sim2Real Transfer

70 A wide range of strategies have been developed to address the sim-to-real gap, including domain  
 71 randomization, adaptive policy learning, and data-driven model learning.

72 **Domain Randomization.** Early efforts employed domain randomization (DR) to expose policies  
 73 to diverse visual and physical variations during training [10], later extending to randomized dynam-  
 74 ics [9, 22, 26, 27, 28] and sensor perturbations [29, 8]. While DR improves robustness, overly broad  
 75 parameter ranges can lead to conservative policies that underperform on the true system. To address  
 76 this, recent methods adapt the randomization process during training. Curriculum and adversarial  
 77 DR strategies [30, 31] shape the parameter distributions over time, while others refine DR bounds

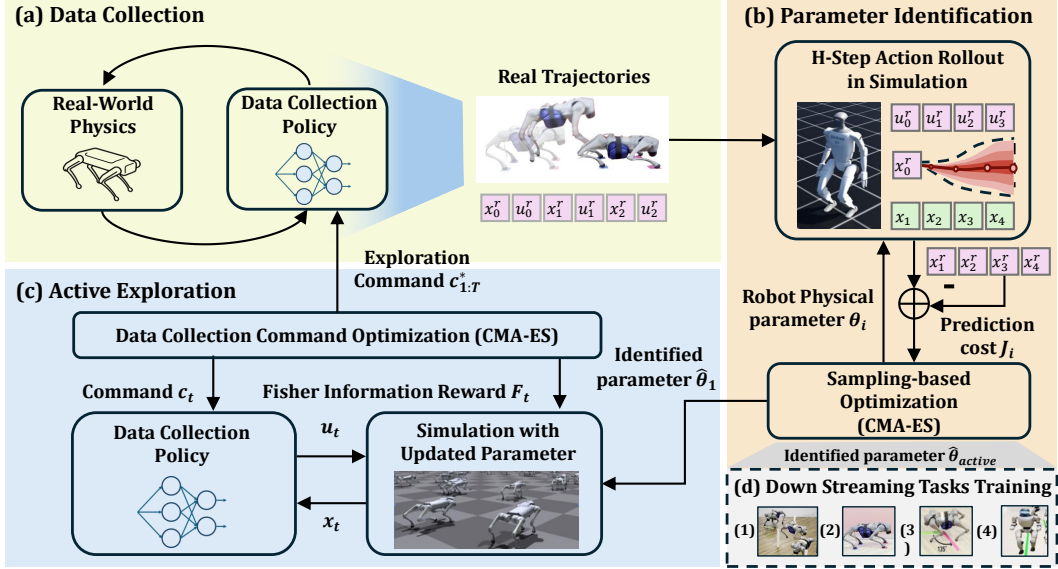

Figure 2: Overview of **SPI-Active**. **Data Collection**: Collect real-world trajectories using a multi-behavioral policy. **Parameter Identification**: Estimate physical parameters via simulation-to-real rollout matching by sampling-based optimization. **Active Exploration**: Optimize data-collection commands to maximize Fisher Information and gather informative data. **Downstream Task Training**: Use identified parameters to train accurate locomotion controllers

78 using real-world data [32]. Despite these advances, DR still relies heavily on heuristics, requiring  
 79 expert tuning and task-specific knowledge.

80 **Learning Adaptive Policies.** Beyond DR, several approaches leverage online adaptation during  
 81 deployment [33, 34, 17, 35] or use offline data for sim-to-real transfer [36] or condition the learnt  
 82 policy on the prediction of model parameters online [37]. Some methods further adapt policies or  
 83 simulation parameters during real-world rollouts to enable continual learning [18, 38], but these  
 84 typically require high-quality data and are not zero-shot.

85 **Data-driven Model Learning.** Another class of methods learns data-driven residual networks that  
 86 output corrective torques [39] or actions [40] to compensate for unmodeled dynamics. While ef-  
 87 fective in specific settings, these methods risk overfitting to the training tasks or trajectories, or  
 88 requiring ground-truth torques [16], limiting their generalization to new or diverse tasks.

## 89 2.2 “White-Box” System Identification of Non-linear Dynamics

90 Modeling and identifying nonlinear dynamical systems remains challenging [41, 42, 19]. A foun-  
 91 dational approach introduced least-squares estimation of inertial parameters via linearity in inverse  
 92 dynamics [11], later refined with minimal parameter sets and model selection [43, 44, 45]. However,  
 93 most methods assume structured and fixed-base models, limiting applicability to legged robots with  
 94 discontinuous contacts and strong nonlinearities. Prior work mainly focuses on actuator modeling  
 95 using analytical or hardware-specific approaches [22, 46, 23], while base parameter identification  
 96 often requires constrained setups or physical disassembly [22, 47]. A related two-stage method [26]  
 97 estimates actuator dynamics via latent-conditioned policies, but omits inertial parameters and lacks  
 98 explicit torque decay modeling. In contrast, our framework jointly identifies inertial and actuator  
 99 parameters with interpretable structure and improved sample efficiency.

## 100 2.3 Targeted Exploration for System Identification and Model Learning

101 Accurate System identification relies on collecting trajectories that sufficiently excite the dynam-  
 102 ics of interest. Classic works on optimal experiment design [48, 49, 50] formalizes this using the  
 103 Fisher Information Matrix (FIM) to reduce parameter uncertainty. Recent works extend this to non-  
 104 linear and hybrid systems: [25] optimize excitation for mechanical systems, while [51] leverage

differentiable contact simulation to identify informative contact modes. Learning-based approaches such as ASID [24] and task-oriented exploration [52] actively excite dynamics via policy optimization. Others focus on scalable pipelines, including trajectory design benchmarks for inertial ID [53] and automated Real2Sim via robotic interaction [20]. Building on these foundations, we optimize command sequences of multi-behavioral policies to reliably excite informative dynamics, enabling scalable and robust parameter identification for high-dimensional legged robots.

### 3 SPI: Sampling-based Parameter Identification for Legged Robot

In this section, we introduce a zeroth-order system identification approach that leverages GPU-based parallel sampling to efficiently estimate the physical parameters of legged robots.

**Preliminary:** Consider the dynamics of the legged system given by:  $\mathbf{x}_{t+1} = f(\mathbf{x}_t, \mathbf{u}_t; \theta)$ , where  $\mathbf{x}_t \in \mathcal{X} \subseteq \mathbb{R}^n$  is the state,  $\mathbf{u}_t \in \mathcal{U}$  is the control input, and  $\theta \in \Theta \subseteq \mathbb{R}^d$  represents the unknown model parameters to be identified using state-action trajectories collected from the real-world system. Given a dataset  $\mathcal{D}$  consisting of observed state-action sequences  $\mathcal{D} = \{(\mathbf{x}_t, \mathbf{u}_t)\}_{t=1}^N$ , the system identification problem can be formulated as the following optimization problem:

$$\theta^* = \arg \min_{\theta \in \Theta} \sum_{t=1}^N \|\mathbf{x}_{t+1} - f(\mathbf{x}_t, \mathbf{u}_t; \theta)\|^2. \quad (1)$$

where  $\theta^*$  is the optimal robot parameter that minimizes the prediction error between the observed states from real-world data and predicted states from the model. Specifically for legged systems, we identify a set of physical parameters  $\theta = [\theta_{\text{in}}, \theta_{\text{mo}}]^T$ , where  $\theta_{\text{in}}$  represents the mass-inertia properties, including the mass, center of mass, and inertia of rigid bodies, and  $\theta_{\text{mo}}$  denotes actuator model parameters that characterize motor dynamics. To ensure physical consistency in the mass-inertial parameterization, we apply the Log-Cholesky decomposition (Appendix A.4) to enforce it follows the Linear Matrix Inequality (LMI) constraint. In this work, we focus on identifying the robot’s base link parameter identification. However, the approach can be readily extended to additional links with minimal modification.

**Actuator Dynamics Modeling:** In physics-based simulators, RL policies typically apply joint torques directly, with only torque limits enforced. However, real-world actuators exhibit significant non-linearities in high-torque regimes, leading to torque decay between commanded and actual outputs, which degrades performance in precision-critical or dynamic tasks. To better capture these effects, we formulate an actuator dynamics model, inspired from [54], using a hyperbolic tangent function to map desired to actual torques in simulation:

$$\tau_{\text{motor}} = \kappa \cdot \tanh\left(\frac{\tau_{\text{PD}}}{\kappa}\right), \quad \tau_{\text{PD}} = \mathbf{K}_p(\mathbf{q}_{\text{target}} - \mathbf{q}) - \mathbf{K}_d\dot{\mathbf{q}}, \quad (2)$$

where  $\mathbf{q}_{\text{target}}, \mathbf{q}, \dot{\mathbf{q}} \in \mathbb{R}^N$  denote target positions, joint states, and velocities. We assign joint-specific scaling parameters  $\kappa$  to accommodate differences in motor types and load conditions.

**Data Collection and Pre-Processing:** The goal of the data collection process is to induce diverse motion patterns improving parameter observability. To this end, we collect data for Stage 1 of SPI-Active using heuristically designed motion-priors and input command sequences of pre-trained RL locomotion policies (Figure. 2(a)). The resulting real-world trajectories form the dataset  $\mathcal{D}_j = \{(\mathbf{x}_{t,j}, \mathbf{u}_{t,j})\}_{t=1}^{N_j}$ ,  $\mathcal{D} = \{\mathcal{D}_j\}$ . To enhance the predictive capability of the system parameters, we extend the single-step system identification to a multi-step prediction formulation. Therefore, the dataset is segmented into various clips  $\{c_k\}_{k=1}^{N_c}$  with horizon lengths  $H$ , following the simulation error criterion [13], where the length  $H$  is sampled from uniform distribution  $\mathcal{U}(H_{\text{min}}, H_{\text{max}})$ . Varying the clip length avoids bias introduced by fixed horizons and introduces an averaging effect that balances simulation error across trajectories. While this process, provides broad state-action coverage, the collected data might still lack targeted excitation of certain system parameters and designing heuristics for specific parameter excitation is often nontrivial. This limitation motivates the need for active trajectory design which we address in Section. 4.



---

**Algorithm 1 SPI-ACTIVE: TWO-STAGE SAMPLING-BASED SYSID VIA ACTIVE EXPLORATION**


---

```

1: Input: Data-collection policy  $\pi(u_t | x_t, c_t)$ , Simulator  $f(x, u; \theta)$ , Initial robot parameter  $\theta_0$ 
2: Output: Refined parameters  $\hat{\theta}_{active}$ 

3: Stage 1: Initial Identification
4:  $\mathcal{D}_0 \leftarrow$  collect real-world data using  $\pi$  with action primitives.
5:  $\hat{\theta}_1 \leftarrow \text{SPI}(\mathcal{D}_0, \theta_0)$ 
6: Stage2: Active Exploration and Refinement
7:  $c_{1:T}^* \leftarrow \arg \min_{c_{1:T}} \text{tr}(\mathbf{F}(\hat{\theta}_1, \pi)^{-1})$  ▷ FIM optimization using CMA-ES
8:  $\mathcal{D}_1 \leftarrow$  collect data using  $\pi(u_t | x_t, c_t)$ ,  $c_t \sim c_{1:T}^*$ 
9:  $\hat{\theta}_{active} \leftarrow \text{SPI}(\mathcal{D}_1, \hat{\theta}_1)$ 
10: return  $\hat{\theta}_{active}$ 



---


SPI ( $\mathcal{D}, \theta$ ):
11: Segment  $\mathcal{D}$  into clips  $\{c_k\}$ , initialize CMA-ES with  $\theta, \Sigma$ 
12: repeat
13:   Sample  $\{\theta_j\}_{j=1}^B \sim \mathcal{N}(\theta, \Sigma)$  ▷ Parallel rollouts
14:   for each  $\theta_j$  do
15:     Evaluate trajectory prediction cost  $J(\theta_j, \{c_k\})$  based on equation (3)
16:   Update CMA-ES using  $J(\theta_j)$ 
17: until convergence
18: return  $\arg \min_{\theta} J(\theta)$ 

```

---

149 **Sampling-based Optimization Formulation:** We formulate the identification problem as a non-  
150 linear least-squares H-Step Sequential prediction problem, with the cost function defined as:

$$J(\theta, \{c_k\}) = \sum_{k=1}^N \sum_{t=0}^{H-1} \|\mathbf{x}_{t+1,k}^r - \mathbf{x}_{t+1,k}\|_{\mathbf{W}_x}^2 + \|\theta - \theta_0\|_{\mathbf{W}_\theta}^2, \quad \mathbf{x}_{t+1,k} = f(\mathbf{x}_{t,k}, \mathbf{u}_{t,k}^r; \theta) \quad (3)$$

151 where  $f$  is the simulated dynamics conditioned on the parameter  $\theta$ ,  $\mathbf{x}_{t,k}$  is the simulated state at  
152 timestep  $t$  and corresponding to clip  $c_k$ . The initial state for each clip is aligned with the real-world  
153 trajectory segment, and subsequent states are simulated using recorded control inputs  $\mathbf{u}_{t,k}^r$ . Given  
154 that main-stream RL-focused simulators such as Isaacgym are non-differentiable but parallelizable,  
155 we adopt a sampling-based optimization approach inspired by the recent works [55]. The optimal  
156 parameter estimate  $\theta$  is found by minimizing  $J(\theta)$  and this optimization is performed using the  
157 CMA-ES[56] framework within the optuna library [57]. At each iteration a batch of candidate  
158 parameter vectors  $\{\theta_j\}_{j=1}^B$  is sampled. The candidates are evaluated in parallel and  $J(\theta_j)$  are used  
159 to update CMA-ES distribution until convergence (Figure. 2(b)).

## 160 4 SPI-Active: Active Exploration for Informative Data Collection

161 The performance of the Sampling-based System Identification framework Section. 3, depends heav-  
162 ily on the informativeness of the collected trajectories. Although Section. 3 uses heuristic design for  
163 data collection, this approach cannot fully excite the system dynamics. To improve data efficiency  
164 and enable more accurate parameter estimation, we introduce a principled trajectory excitation strat-  
165 egy that focuses on collecting a small set of highly informative trajectories. Cramer-Rao Bound [24]  
166 states that the covariance of any unbiased estimator  $\hat{\theta}$  of the true parameters  $\theta^*$  is lower-bounded by  
167 the inverse of the FIM:  $\mathbb{E}_{\mathbf{x}_{1:T} \sim p_{\theta^*}} \left[ (\hat{\theta} - \theta^*)(\hat{\theta} - \theta^*)^\top \right] \succeq \mathbf{F}(\theta^*)^{-1}$ , where the FIM of the parame-  
168 terized trajectory distribution  $p(\mathbf{x}_{1:T} | \theta^*)$  is given by:

$$\mathbf{F}(\theta^*) = \mathbb{E}_{\mathbf{x}_{1:T} \sim p(\cdot | \theta^*)} \left[ \left( \frac{\partial}{\partial \theta} \log p(\mathbf{x}_{1:T} | \theta^*) \right) \left( \frac{\partial}{\partial \theta} \log p(\mathbf{x}_{1:T} | \theta^*) \right)^\top \right] \quad (4)$$

169 Intuitively, identifying an exploration policy  $\pi_{exp}$  that maximizes the FIM reduces the lower bound  
170 on the estimation variance. However, directly optimizing the FIM through an exploration policy

may produce erratic behaviors. To this end, we propose a practical exploration strategy based on trajectory-level command optimization. Let  $\pi(u_t|x_t, c_t)$  be a command-conditioned multi-behavioral policy/controller, where  $u_t$  is the control action,  $x_t$  is the system state and  $c_t$  is the command that modulates the velocities and locomotion behaviors. Rather than learning an exploration policy from scratch, we instead optimize over the command sequences  $\mathbf{c}_{1:N}$ , which enables the policy to generate diverse trajectories that can excite different modes of the underlying dynamics:

$$\mathbf{c}_{1:T}^* = \arg \min_{\mathbf{c}_{1:T}} \text{tr}(\mathbf{F}(\theta^*, \pi)^{-1}) \quad (5)$$

Considering the dynamics Eq. 3 to have a Gaussian process noise,  $w_t \sim \mathcal{N}(0, \sigma^2 I)$ , the  $\mathbf{F}(\theta^*, \pi)$  can be approximated with [24]:

$$\mathbf{F}(\theta^*, \pi) \approx \sigma^{-2} \cdot \mathbb{E}_{p(\cdot|\hat{\theta}_1, \pi)} \left[ \sum_{t=1}^T \frac{\partial f(x_t, u_t; \hat{\theta}_1)}{\partial \theta} \cdot \left( \frac{\partial f(x_t, u_t; \hat{\theta}_1)}{\partial \theta} \right)^\top \right] \quad (6)$$

This optimization is solved using the same CMA-ES optimizer described in Section. 3, to handle the non-differentiable dynamics and fully utilized the parallelization of the GPU-based simulator. Further, solving Eq. 4 requires  $\theta^*$  which is not available in practice, hence we substitute it with the current best estimate  $\hat{\theta}_1$  obtained from the Stage 1. Additional implementation details for the FIM maximization are provided in the Appendix A.3. The pseudo-code for the entire process in **SPI-Active** is provided in the Algorithm. 1.

## 5 Experiments

In this section, we present extensive experimentation results of our framework on both quadruped and humanoid systems. Through our experiments, we would like to answer the following questions:

1. Does **SPI** identify accurate robot models that match real-world dynamics?
2. Do the models identified by our methods enable improved sim2real transfer of RL policies for high-precision locomotion tasks?
3. Does the exploration strategy in **SPI-Active** further improve the performance of **SPI**?

### 5.1 Tasks and Hardware Overview

We evaluate the framework across the platforms, Unitree Go2 and Unitree G1. To examine the performance of sim2real transfer we consider four tasks namely: **Forward Jump**, **Yaw Jump**, **Velocity Tracking**, **Attitude Tracking** for the Unitree Go2 with an attached payload of 4.7 kg ( $\sim$  one-third of its weight) and **Velocity Tracking** for Unitree G1. These tasks prominently exhibit the sim-to-real gap, and detailed task definitions and metrics can be found in the appendix A.1 and parameter identification results are in appendix A.6. For all the tasks, RL policies were trained with Isaac Gym [58] and we use Proximal Policy algorithm (PPO)[59] to maximize the cumulative discounted reward  $\mathbb{E} \left[ \sum_{t=1}^T \gamma^{t-1} r_t \right]$ .

**Baselines:** For each baseline, we specify the corresponding URDF and the Domain Randomization (DR) range for the trained RL policy, if applicable:

- **Vanilla:** Uses the nominal URDF with added payload and nominal DR range (Table 8, Column 1).
- **Heavy DR:** Uses the same URDF as Vanilla but with a wider DR range (Table 8, Column 2).
- **Gradient-based Sys-ID (GD):** URDF parameters are identified using the gradient-based optimization method [60] with differentiable simulator (MJX [61]).
- **SPI:** Uses the URDF updated with parameters  $\hat{\theta}_1$  from Stage 1 and nominal DR range.
- **SPI-Active:** Uses the URDF updated with parameters  $\hat{\theta}_{active}$  from Stage 2 and nominal DR range.

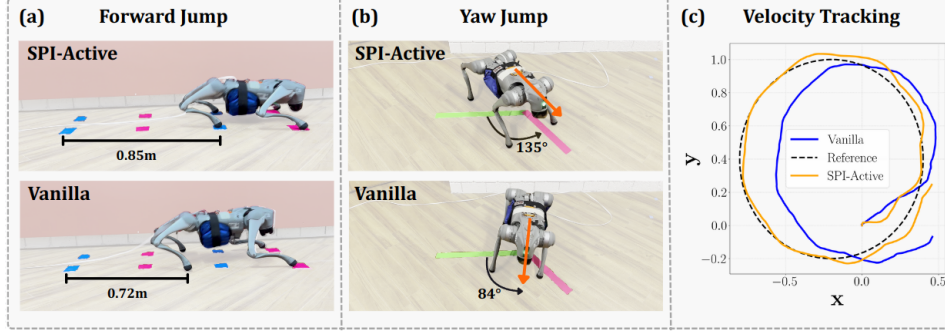

Figure 3: Task Performance comparison of **SPI-Active** vs Vanilla in (i) Forward Jump, (ii) Yaw Jump, (iii) and Velocity Tracking

Table 1: (a) Comparison of Prediction Accuracy and (b) Task Performance Across Methods

(a) Normalized Aggregate Prediction Error

| Method            | $J_{rpos} \downarrow$ | $J_{pja} \downarrow$ | $J_{rvel} \downarrow$ |
|-------------------|-----------------------|----------------------|-----------------------|
| Vanilla           | 1.00                  | 1.00                 | 1.00                  |
| GD                | 0.98                  | 1.14                 | 1.05                  |
| <b>SPI</b>        | 0.87                  | 0.89                 | 0.95                  |
| <b>SPI-Active</b> | <b>0.67</b>           | <b>0.72</b>          | <b>0.91</b>           |

(b) Normalized Performance Across Tasks ( $\downarrow$ )

| Method            | $J_{\bar{f}} \downarrow$           | $J_{y\bar{f}} \downarrow$          | $J_{vt} \downarrow$                | $J_{at} \downarrow$                | $J_{hvt} \downarrow$ |
|-------------------|------------------------------------|------------------------------------|------------------------------------|------------------------------------|----------------------|
| Vanilla           | $1.00 \pm 0.000$                   | $1.00 \pm 0.000$                   | $1.00 \pm 0.000$                   | $1.00 \pm 0.000$                   | $1.00 \pm 0.066$     |
| Heavy DR          | $1.75 \pm 0.033$                   | $1.40 \pm 0.021$                   | $1.06 \pm 0.022$                   | $0.85 \pm 0.040$                   | $1.10 \pm 0.064$     |
| <b>SPI</b>        | $0.60 \pm 0.014$                   | $0.64 \pm 0.066$                   | $0.80 \pm 0.044$                   | $0.96 \pm 0.042$                   | $0.87 \pm 0.064$     |
| <b>SPI-Active</b> | <b><math>0.48 \pm 0.012</math></b> | <b><math>0.37 \pm 0.038</math></b> | <b><math>0.58 \pm 0.014</math></b> | <b><math>0.73 \pm 0.052</math></b> | -                    |

## 5.2 Open-Loop Prediction using Identified Model

To address **Q1**, we compare the prediction accuracy of the simulated trajectories with identified robot parameters of Unitree Go2 against real-world trajectories from a validation data. The data is collected by manually teleoperating Go2 for 60 seconds, while it runs the RL policy following [62]. We further preprocess the data, similar to Section 3 segmenting the data in various clips of average horizon length of 1.5sec. We evaluate the prediction accuracy by comparing the mean tracking error of the global root position  $J_{rpos}$ , per-joint angle  $J_{pja}$  and the global root velocity  $J_{rvel}$ . We report the normalized Quantitative results in Table 1(a) demonstrates that **SPI** and **SPI-Active** consistently outperform the baselines, achieving lower  $J_{rpos}$  and  $J_{pja}$ , indicating more accurate open-loop prediction and closer alignment with real-world dynamics. In contrast, the gradient-based method **GD** exhibits larger prediction errors, possibly due to non-differentiable contact dynamics and the sim-to-sim gap between MJX and Isaac Gym.

## 5.3 Sim2Real Performance

To address **Q2**, we evaluate RL policies fine-tuned with system parameters identified by each method. Policies are trained for tasks shown in Appendix A.1 and deployed directly on hardware without further tuning. As reported in Table 1(b), both **SPI** and **SPI-Active** consistently outperform the baselines across all tasks. In *Velocity Tracking*, *Forward Jump* and *Yaw Jump*, **SPI** achieves an improvement of 19.6%, 39.9% and 35.9% respectively over the *Vanilla* baseline, highlighting improved sim-to-real transfer (Figure 3). While **SPI** under performs in the *Attitude Tracking* task - likely due to insufficient excitation of attitude-related system parameters, **SPI-Active** surpasses all baselines in *Attitude Tracking* (Appendix A.7) and across every task emphasizing the effectiveness of targeted excitation. Additionally, **SPI** improves performance in the *Humanoid Velocity Tracking* task, demonstrating the framework’s generalization across robot morphologies and tasks.

## 5.4 Performance Improvement with Active Exploration

To investigate the effect of active exploration (**Q3**), we evaluate the impact of active exploration on real-world task performance by comparing three variants on the *Forward Jump* task: (1) **SPI**, (2) **SPI** +random where second-stage data is collected using randomly sampled input commands, and (3) **SPI-Active**. As shown in Fig. 4(c), **SPI-Active** yields a jumping distance error (3.6cm), lower compared to the other variants, demonstrating the effectiveness of targeted trajectory excitation for parameter identification. Further, Fig. 4(a) and (b) demonstrate that FIM-based command

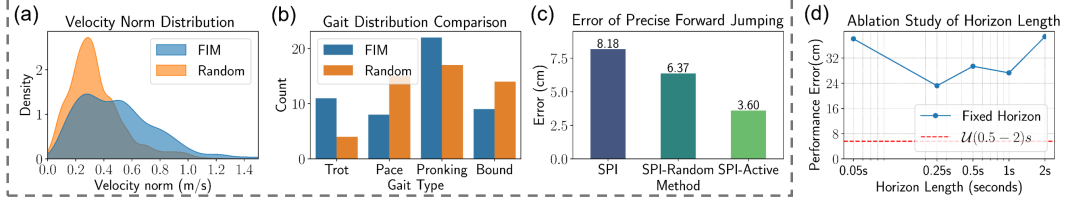

Figure 4: Effect of Active Exploration: (a) Velocity Magnitude Distribution (b) Gait Pattern Distribution and (c) Forward Jumping error comparison. Horizon Length Ablation (d)

optimization induces trajectories with higher velocity norm distributions and a higher occurrence of high-torque gaits such as pronking. This results in richer excitation of the system dynamics, which is critical for accurate parameter identification.

## 5.5 Ablation Studies

**Role of Actuator Modeling in Policy Transfer:** Here we discuss the performance impact of using different motor models. We evaluate four torque models: (1) **Vanilla** (ideal torques), (2) **Linear Gain**, (3) **Unified Tanh** with unified  $\kappa$ , and (4) **Ours** (motor-specific  $\kappa$ ), where we choose unique  $\kappa_i$  for hip, calf and thigh motors of Unitree Go2. Real-world experiments were conducted on the *Forward Jump* and *Yaw Jump* tasks. We report the normalized task metrics with respect to the Vanilla baseline in Table 2.

It can be observed that, our model achieves the lowest error in both tasks. In the *Forward Jump* task, our method and Unified Tanh outperform the vanilla baseline by 45% and 26% respectively, highlighting the benefit of modeling joint-specific nonlinearities for high-torque maneuvers.

However, in the *Yaw Jump* task, the Unified Tanh underperforms the Vanilla baseline, which is likely due to the lower torque demands and the effect of angular inertia, where unified scaling fails to capture joint-specific behavior.

**Influence of Horizon Length on Policy Performance:** We also investigate the effect of horizon length  $H$  when segmenting trajectory clips  $c_k$  during system identification, using the *Forward Jump* task. We compare fixed-length horizons (0.05s to 2s) against uniformly sampled horizons within this range. As shown in Figure 4(d), uniformly sampled horizons lead to better estimation and downstream performance. Results show that smaller  $H$  fails to capture long-term temporal dependencies needed for accurate estimation, while larger  $H$  suffers from instability of the open-loop action rollout. Uniformly sampling  $H$  during Stage 1 yields a better trade-off, enabling the identification process to benefit from both short and long-horizon dynamics.

Table 2: Comparison of Motor Models on Normalized Task Metrics

| Method       | Definition ( $\tau_{\text{motor}} \sim$ )  | $J_{fj} \downarrow$                | $J_{yj} \downarrow$                |
|--------------|--------------------------------------------|------------------------------------|------------------------------------|
| Vanilla      | $\tau_{PD}$                                | $1.00 \pm 0.00$                    | $1.00 \pm 0.00$                    |
| Linear Gain  | $\kappa \cdot \tau_{PD}$                   | $1.30 \pm 0.023$                   | $1.54 \pm 0.011$                   |
| Unified Tanh | $\kappa \cdot \tanh(\tau_{PD}/\kappa)$     | $0.74 \pm 0.009$                   | $1.17 \pm 0.019$                   |
| Ours         | $\kappa_i \cdot \tanh(\tau_{PD}/\kappa_i)$ | <b><math>0.55 \pm 0.015</math></b> | <b><math>0.76 \pm 0.042</math></b> |

## 6 Conclusion

We presented a two-stage, sampling-based system identification framework for legged robots that combines robust physical parameter estimation with an active trajectory excitation strategy to enable precise and scalable sim-to-real transfer. Our method does not rely on differentiable simulators or ground-truth torques, making it broadly applicable across different robotic platforms. By leveraging heuristic RL policies in the first stage and optimizing command sequences for Fisher Information in the second, our approach generates informative trajectories that excite key inertial and actuator parameters ensuring reliable hardware execution. Experimental results on the Unitree Go2 and G1 demonstrate significant improvements in tracking accuracy and task performance compared to domain randomization and baseline identification approaches. These results highlight the importance of accurate model identification and targeted data collection in bridging the sim-to-real gap for legged locomotion.

## 7 Limitations

While our framework demonstrates strong performance on quadrupeds, its application to humanoids is currently limited to Stage 1 identification. Extending active trajectory excitation to humanoid systems is a promising direction, but presents challenges due to their high dimensionality and safety-critical dynamics. Additionally, our method operates offline; enabling online or adaptive identification could improve real-time performance in dynamic settings. The approach also assumes access to a multi-behavioral policy for generating diverse motions, which may not generalize to novel morphologies. Lastly, while CMA-ES enables parallelizable optimization, it can be computationally demanding in high-dimensional spaces, motivating future work on more sample-efficient or uncertainty-aware alternatives.

## References

- [1] J. Lee, J. Hwangbo, L. Wellhausen, V. Koltun, and M. Hutter. Learning quadrupedal locomotion over challenging terrain. *Science Robotics*, 5(47):eabc5986, Oct. 2020. ISSN 2470-9476. doi:10.1126/scirobotics.abc5986. URL <https://www.science.org/doi/10.1126/scirobotics.abc5986>.
- [2] T. Miki, J. Lee, J. Hwangbo, L. Wellhausen, V. Koltun, and M. Hutter. Learning robust perceptive locomotion for quadrupedal robots in the wild. *Science Robotics*, 7(62):eabk2822, Jan. 2022. ISSN 2470-9476. doi:10.1126/scirobotics.abk2822. URL <https://www.science.org/doi/10.1126/scirobotics.abk2822>.
- [3] Y. Yang, G. Shi, X. Meng, W. Yu, T. Zhang, J. Tan, and B. Boots. CAJun: Continuous Adaptive Jumping using a Learned Centroidal Controller, 2023. URL <https://arxiv.org/abs/2306.09557>.
- [4] Z. Zhuang, S. Yao, and H. Zhao. Humanoid Parkour Learning, 2024. URL <https://arxiv.org/abs/2406.10759>.
- [5] T. He, C. Zhang, W. Xiao, G. He, C. Liu, and G. Shi. Agile But Safe: Learning Collision-Free High-Speed Legged Locomotion, 2024. URL <https://arxiv.org/abs/2401.17583>.
- [6] D. Hoeller, N. Rudin, D. Sako, and M. Hutter. ANYmal parkour: Learning agile navigation for quadrupedal robots. *Science Robotics*, 9(88):eadi7566, Mar. 2024. ISSN 2470-9476. doi:10.1126/scirobotics.adi7566. URL <https://www.science.org/doi/10.1126/scirobotics.adi7566>.
- [7] F. Muratore, F. Ramos, G. Turk, W. Yu, M. Gienger, and J. Peters. Robot Learning from Randomized Simulations: A Review, 2021. URL <https://arxiv.org/abs/2111.00956>.
- [8] A. Loquercio, E. Kaufmann, R. Ranftl, A. Dosovitskiy, V. Koltun, and D. Scaramuzza. Deep Drone Racing: From Simulation to Reality With Domain Randomization. *IEEE Transactions on Robotics*, 36(1):1–14, Feb. 2020. ISSN 1552-3098, 1941-0468. doi:10.1109/TRO.2019.2942989. URL <https://ieeexplore.ieee.org/document/8877728/>.
- [9] X. B. Peng, M. Andrychowicz, W. Zaremba, and P. Abbeel. Sim-to-Real Transfer of Robotic Control with Dynamics Randomization. In *2018 IEEE International Conference on Robotics and Automation (ICRA)*, pages 3803–3810, Brisbane, QLD, May 2018. IEEE. ISBN 9781538630815. doi:10.1109/ICRA.2018.8460528. URL <https://ieeexplore.ieee.org/document/8460528/>.
- [10] J. Tobin, R. Fong, A. Ray, J. Schneider, W. Zaremba, and P. Abbeel. Domain randomization for transferring deep neural networks from simulation to the real world. In *2017 IEEE/RSJ*



- 325 *International Conference on Intelligent Robots and Systems (IROS)*, pages 23–30, Vancouver,  
326 BC, Sept. 2017. IEEE. ISBN 9781538626825. doi:10.1109/IROS.2017.8202133. URL  
327 <http://ieeexplore.ieee.org/document/8202133/>.
- 328 [11] C. An, C. Atkeson, and J. Hollerbach. Estimation of inertial parameters of rigid body links  
329 of manipulators. In *1985 24th IEEE Conference on Decision and Control*, pages 990–995,  
330 Fort Lauderdale, FL, USA, Dec. 1985. IEEE. doi:10.1109/CDC.1985.268648. URL <http://ieeexplore.ieee.org/document/4048448/>.
- 332 [12] H. Mayeda, K. Yoshida, and K. Osuka. Base parameters of manipulator dynamic models.  
333 *IEEE Transactions on Robotics and Automation*, 6(3):312–321, June 1990. ISSN 2374-958X.  
334 doi:10.1109/70.56663. URL <https://ieeexplore.ieee.org/document/56663/>.
- 335 [13] T. Lee, J. Kwon, P. M. Wensing, and F. C. Park. Robot Model Identification and Learning:  
336 A Modern Perspective. *Annual Review of Control, Robotics, and Autonomous Systems*, 7(1):  
337 311–334, July 2024. ISSN 2573-5144. doi:10.1146/annurev-control-061523-102310. URL  
338 [https://www.annualreviews.org/content/journals/10.1146/annurev-](https://www.annualreviews.org/content/journals/10.1146/annurev-control-061523-102310)  
339 [control-061523-102310](https://www.annualreviews.org/content/journals/10.1146/annurev-control-061523-102310).
- 340 [14] M. P. Deisenroth and C. E. Rasmussen. Pilco: a model-based and data-efficient approach to  
341 policy search. In *Proceedings of the 28th International Conference on International Confer-*  
342 *ence on Machine Learning*, ICML’11, page 465–472, Madison, WI, USA, 2011. Omnipress.  
343 ISBN 9781450306195.
- 344 [15] G. Shi, X. Shi, M. O’Connell, R. Yu, K. Azizzadenesheli, A. Anandkumar, Y. Yue, and S.-  
345 J. Chung. Neural lander: Stable drone landing control using learned dynamics. In *2019*  
346 *International Conference on Robotics and Automation (ICRA)*, pages 9784–9790, 2019. doi:  
347 [10.1109/ICRA.2019.8794351](https://doi.org/10.1109/ICRA.2019.8794351).
- 348 [16] J. Hwangbo, J. Lee, A. Dosovitskiy, D. Bellicoso, V. Tsounis, V. Koltun, and M. Hut-  
349 ter. Learning agile and dynamic motor skills for legged robots. *Science Robotics*, 4(26):  
350 eaau5872, Jan. 2019. ISSN 2470-9476. doi:10.1126/scirobotics.aau5872. URL <https://www.science.org/doi/10.1126/scirobotics.aau5872>.
- 352 [17] A. Kumar, Z. Fu, D. Pathak, and J. Malik. RMA: Rapid Motor Adaptation for Legged Robots,  
353 2021. URL <https://arxiv.org/abs/2107.04034>.
- 354 [18] P. Wu, W. Xie, J. Cao, H. Lai, and W. Zhang. Loopsr: Looping sim-and-real for lifelong policy  
355 adaptation of legged robots, 2024. URL <https://arxiv.org/abs/2409.17992>.
- 356 [19] T. B. Schön, A. Wills, and B. Ninness. System identification of nonlinear state-space models.  
357 *Automatica*, 47(1):39–49, Jan. 2011. ISSN 00051098. doi:10.1016/j.automatica.2010.10.013.  
358 URL [https://linkinghub.elsevier.com/retrieve/pii/S000510981000](https://linkinghub.elsevier.com/retrieve/pii/S0005109810004279)  
359 [4279](https://linkinghub.elsevier.com/retrieve/pii/S0005109810004279).
- 360 [20] N. Pfaff, E. Fu, J. Binaglia, P. Isola, and R. Tedrake. Scalable Real2Sim: Physics-Aware Asset  
361 Generation Via Robotic Pick-and-Place Setups, 2025. URL [https://arxiv.org/abs/](https://arxiv.org/abs/2503.00370)  
362 [2503.00370](https://arxiv.org/abs/2503.00370).
- 363 [21] M. Gautier and W. Khalil. A direct determination of minimum inertial parameters of robots. In  
364 *Proceedings. 1988 IEEE International Conference on Robotics and Automation*, pages 1682–  
365 1687, Philadelphia, PA, USA, 1988. IEEE Comput. Soc. Press. ISBN 9780818608520. doi:  
366 [10.1109/ROBOT.1988.12308](https://doi.org/10.1109/ROBOT.1988.12308). URL [http://ieeexplore.ieee.org/document/1](http://ieeexplore.ieee.org/document/12308/)  
367 [2308/](http://ieeexplore.ieee.org/document/12308/).
- 368 [22] J. Tan, T. Zhang, E. Coumans, A. Iscen, Y. Bai, D. Hafner, S. Bohez, and V. Vanhoucke.  
369 Sim-to-Real: Learning Agile Locomotion For Quadruped Robots. In *Robotics: Science and*  
370 *Systems XIV*. Robotics: Science and Systems Foundation, June 2018. ISBN 9780992374747.

- doi:10.15607/RSS.2018.XIV.010. URL <http://www.roboticsproceedings.org/rss14/p10.pdf>.
- [23] R. Grandia, E. Knoop, M. Hopkins, G. Wiedebach, J. Bishop, S. Pickles, D. Müller, and M. Bächer. Design and Control of a Bipedal Robotic Character. In *Robotics: Science and Systems XX*. Robotics: Science and Systems Foundation, July 2024. ISBN 9798990284807. doi:10.15607/RSS.2024.XX.103. URL <http://www.roboticsproceedings.org/rss20/p103.pdf>.
- [24] M. Memmel, A. Wagenmaker, C. Zhu, D. Fox, and A. Gupta. ASID: Active Exploration for System Identification in Robotic Manipulation. Jan. 2024. URL <https://openreview.net/forum?id=pdhMe50hZI>.
- [25] T. Lee, B. D. Lee, and F. C. Park. Optimal excitation trajectories for mechanical systems identification. *Automatica*, 131:109773, Sept. 2021. ISSN 00051098. doi:10.1016/j.automatica.2021.109773. URL <https://linkinghub.elsevier.com/retrieve/pii/S0005109821002934>.
- [26] W. Yu, V. C. V. Kumar, G. Turk, and C. K. Liu. Sim-to-real transfer for biped locomotion. In *2019 IEEE/RSJ International Conference on Intelligent Robots and Systems (IROS)*, pages 3503–3510, 2019. URL <https://ieeexplore.ieee.org/document/8967890>.
- [27] M. Mozifian, J. C. G. Higuera, D. Meger, and G. Dudek. Learning domain randomization distributions for training robust locomotion policies, 2019. URL <https://arxiv.org/abs/1906.00410>.
- [28] J. Siekmann, Y. Godse, A. Fern, and J. Hurst. Sim-to-real learning of all common bipedal gaits via periodic reward composition. In *2021 IEEE International Conference on Robotics and Automation (ICRA)*, 2021. URL <https://ieeexplore.ieee.org/document/9561248>.
- [29] F. Sadeghi and S. Levine. CAD2RL: Real Single-Image Flight without a Single Real Image, 2016. URL <https://arxiv.org/abs/1611.04201>.
- [30] B. Mehta, M. Diaz, F. Golemo, C. J. Pal, and L. Paull. Active domain randomization, 2019. URL <https://arxiv.org/abs/1904.04762>.
- [31] L. Pinto, J. Davidson, R. Sukthankar, and A. Gupta. Robust adversarial reinforcement learning. In *International Conference on Machine Learning*, pages 2817–2826. PMLR, 2017.
- [32] Y. Chebotar, A. Handa, V. Makoviychuk, M. Macklin, J. Issac, N. Ratliff, and D. Fox. Closing the Sim-to-Real Loop: Adapting Simulation Randomization with Real World Experience. In *2019 International Conference on Robotics and Automation (ICRA)*, pages 8973–8979, May 2019. doi:10.1109/ICRA.2019.8793789. URL <https://ieeexplore.ieee.org/document/8793789/>. ISSN: 2577-087X.
- [33] A. Kumar, Z. Li, J. Zeng, D. Pathak, K. Sreenath, and J. Malik. Adapting Rapid Motor Adaptation for Bipedal Robots, 2022. URL <https://arxiv.org/abs/2205.15299>.
- [34] H. Qi, A. Kumar, R. Calandra, Y. Ma, and J. Malik. In-Hand Object Rotation via Rapid Motor Adaptation, 2022. URL <https://arxiv.org/abs/2210.04887>.
- [35] G. B. Margolis, X. Fu, Y. Ji, and P. Agrawal. Learning to See Physical Properties with Active Sensing Motor Policies, 2023. URL <https://arxiv.org/abs/2311.01405>.
- [36] A. Bose, S. S. Du, and M. Fazel. Offline multi-task transfer rl with representational penalization, 2024. URL <https://arxiv.org/abs/2402.12570>.
- [37] W. Yu, J. Tan, C. K. Liu, and G. Turk. Preparing for the unknown: Learning a universal policy with online system identification, 2017. URL <https://arxiv.org/abs/1702.02453>.

- [38] L. Smith, J. C. Kew, X. B. Peng, S. Ha, J. Tan, and S. Levine. Legged robots that keep on learning: Fine-tuning locomotion policies in the real world, 2021. URL <https://arxiv.org/abs/2110.05457>.
- [39] N. Fey, G. B. Margolis, M. Peticco, and P. Agrawal. Bridging the sim-to-real gap for athletic loco-manipulation, 2025. URL <https://arxiv.org/abs/2502.10894>.
- [40] T. He, J. Gao, W. Xiao, Y. Zhang, Z. Wang, J. Wang, Z. Luo, G. He, N. Sobanbab, C. Pan, Z. Yi, G. Qu, K. Kitani, J. Hodgins, L. J. Fan, Y. Zhu, C. Liu, and G. Shi. Asap: Aligning simulation and real-world physics for learning agile humanoid whole-body skills, 2025. URL <https://arxiv.org/abs/2502.01143>.
- [41] L. Ljung. System Identification. In J. J. Benedetto, A. Procházka, J. Uhlř, P. W. J. Rayner, and N. G. Kingsbury, editors, *Signal Analysis and Prediction*, pages 163–173. Birkhäuser Boston, Boston, MA, 1998. ISBN 9781461272731 9781461217688. doi:10.1007/978-1-4612-1768-8\_11. URL [http://link.springer.com/10.1007/978-1-4612-1768-8\\_11](http://link.springer.com/10.1007/978-1-4612-1768-8_11).
- [42] H. Natke. System identification. *Automatica*, 28(5):1069–1071, Sept. 1992. ISSN 00051098. doi:10.1016/0005-1098(92)90167-E. URL <https://linkinghub.elsevier.com/retrieve/pii/000510989290167E>.
- [43] M. Gautier, P.-O. Vandanjon, and A. Janot. Dynamic identification of a 6 dof robot without joint position data. *2011 IEEE International Conference on Robotics and Automation*, pages 234–239, 2011. URL <https://api.semanticscholar.org/CorpusID:16755317>.
- [44] A. Janot, P.-O. Vandanjon, and M. Gautier. A generic instrumental variable approach for industrial robot identification. *IEEE Transactions on Control Systems Technology*, 22(1):132–145, 2014. doi:10.1109/TCST.2013.2246163.
- [45] Y. Han, J. Wu, C. Liu, and Z. Xiong. An iterative approach for accurate dynamic model identification of industrial robots. *IEEE Transactions on Robotics*, 36(5):1577–1594, 2020. doi:10.1109/TRO.2020.2990368.
- [46] S. Masuda and K. Takahashi. Sim-to-Real Transfer of Compliant Bipedal Locomotion on Torque Sensor-Less Gear-Driven Humanoid, 2022. URL <https://arxiv.org/abs/2204.03897>.
- [47] B. Zhang, D. Haugk, and R. Vasudevan. System Identification For Constrained Robots, Aug. 2024. URL <http://arxiv.org/abs/2408.08830>. arXiv:2408.08830.
- [48] M. Gevers, A. S. Bazanella, X. Bombois, and L. Miskovic. Identification and the Information Matrix: How to Get Just Sufficiently Rich? *IEEE Transactions on Automatic Control*, 54(12):2828–2840, Dec. 2009. ISSN 0018-9286, 1558-2523. doi:10.1109/TAC.2009.2034199. URL <http://ieeexplore.ieee.org/document/5325719/>.
- [49] X. Bombois, M. Gevers, R. Hildebrand, and G. Solari. Optimal experiment design for open and closed-loop system identification. *Communications in Information and Systems*, 11(3):197–224, Mar. 2011. ISSN 2163-4548. doi:10.4310/CIS.2011.v11.n3.a1. URL <https://link.intlpress.com/JDetail/1805791097244827649>.
- [50] L. Gerencser and H. Hjalmarsson. Adaptive input design in system identification. In *Proceedings of the 44th IEEE Conference on Decision and Control*, pages 4988–4993, Seville, Spain, 2005. IEEE. ISBN 9780780395671. doi:10.1109/CDC.2005.1582952. URL <http://ieeexplore.ieee.org/document/1582952/>.
- [51] H. Sathyanarayan and I. Abraham. Exciting Contact Modes in Differentiable Simulations for Robot Learning, 2024. URL <https://arxiv.org/abs/2411.10935>.

- [52] J. Liang, S. Saxena, and O. Kroemer. Learning Active Task-Oriented Exploration Policies for Bridging the Sim-to-Real Gap, 2020. URL <https://arxiv.org/abs/2006.01952>.
- [53] Q. Leboutet, J. Roux, A. Janot, J. R. Guadarrama-Olvera, and G. Cheng. Inertial Parameter Identification in Robotics: A Survey. *Applied Sciences*, 11(9):4303, May 2021. ISSN 2076-3417. doi:10.3390/app11094303. URL <https://www.mdpi.com/2076-3417/11/9/4303>.
- [54] R. Grandia, E. Knoop, M. A. Hopkins, G. Wiedebach, J. Bishop, S. Pickles, D. Müller, and M. Bächer. Design and control of a bipedal robotic character. *arXiv preprint arXiv:2501.05204*, 2025.
- [55] C. Pan, Z. Yi, G. Shi, and G. Qu. Model-based diffusion for trajectory optimization. In *The Thirty-eighth Annual Conference on Neural Information Processing Systems*, 2024. URL <https://openreview.net/forum?id=BJndYScO6o>.
- [56] N. Hansen. The CMA Evolution Strategy: A Tutorial, Mar. 2023. URL <http://arxiv.org/abs/1604.00772>. arXiv:1604.00772.
- [57] T. Akiba, S. Sano, T. Yanase, T. Ohta, and M. Koyama. Optuna: A Next-generation Hyperparameter Optimization Framework, 2019. URL <https://arxiv.org/abs/1907.10902>.
- [58] V. Makoviychuk, L. Wawrzyniak, Y. Guo, M. Lu, K. Storey, M. Macklin, D. Hoeller, N. Rudin, A. Allshire, A. Handa, and G. State. Isaac Gym: High Performance GPU-Based Physics Simulation For Robot Learning, Aug. 2021. URL <http://arxiv.org/abs/2108.10470>. arXiv:2108.10470.
- [59] J. Schulman, F. Wolski, P. Dhariwal, A. Radford, and O. Klimov. Proximal Policy Optimization Algorithms, Aug. 2017. URL <http://arxiv.org/abs/1707.06347>. arXiv:1707.06347.
- [60] Q. Le Lidec, I. Kalevatykh, I. Laptev, C. Schmid, and J. Carpentier. Differentiable simulation for physical system identification. *IEEE Robotics and Automation Letters*, 6(2):3413–3420, 2021. doi:10.1109/LRA.2021.3062323.
- [61] E. Todorov, T. Erez, and Y. Tassa. Mujoco: A physics engine for model-based control. In *2012 IEEE/RSJ International Conference on Intelligent Robots and Systems*, pages 5026–5033. IEEE, 2012. doi:10.1109/IROS.2012.6386109.
- [62] G. B. Margolis and P. Agrawal. Walk these ways: Tuning robot control for generalization with multiplicity of behavior. *Conference on Robot Learning*, 2022.
- [63] T. Akiba, S. Sano, T. Yanase, T. Ohta, and M. Koyama. Optuna: A next-generation hyperparameter optimization framework, 2019. URL <https://arxiv.org/abs/1907.10902>.
- [64] C. D. Sousa and R. Cortesao. Inertia Tensor Properties in Robot Dynamics Identification: A Linear Matrix Inequality Approach. *IEEE/ASME Transactions on Mechatronics*, 24(1):406–411, Feb. 2019. ISSN 1083-4435, 1941-014X. doi:10.1109/TMECH.2019.2891177. URL <https://ieeexplore.ieee.org/document/8603830/>.
- [65] C. Rucker and P. M. Wensing. Smooth parameterization of rigid-body inertia. *IEEE Robotics and Automation Letters*, 7(2):2771–2778, 2022. doi:10.1109/LRA.2022.3144517.
- [66] C. L. Lab. Humanoidverse: A multi-simulator framework for humanoid robot sim-to-real learning. <https://github.com/LeCAR-Lab/HumanoidVerse>, 2025.
- [67] X. B. Peng, P. Abbeel, S. Levine, and M. van de Panne. Deepmimic: example-guided deep reinforcement learning of physics-based character skills. *ACM Trans. Graph.*, 37(4), July 2018. ISSN 0730-0301. doi:10.1145/3197517.3201311. URL <https://doi.org/10.1145/3197517.3201311>.

## A Appendix

### A.1 Tasks Definition

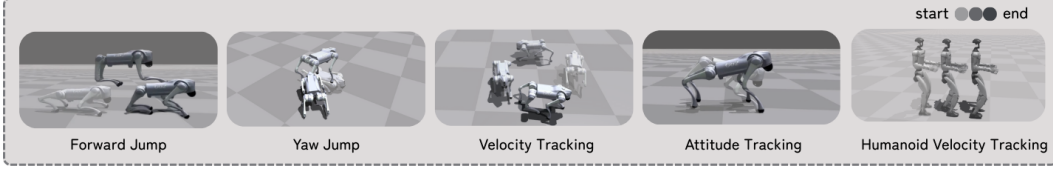

Figure 5: Open-Loop Locomotion Tasks: **Forward Jump**: Jump forward to a predefined distance of 0.85m. **Yaw Jump**: Jump and do Yaw Rotation to a predefined yaw angle of 135 degrees. **Velocity Tracking**: Track a sequence of Open loop 2D twist commands, **Attitude Tracking**: Track a sequence of roll and pitch commands, **Humanoid Velocity Tracking**: Track a sequence of 2D twist velocity commands for a humanoid.

#### A.1.1 Forward Jump

The forward jump task requires the robot to jump forward to a predefined horizontal distance  $x$ . For our experiments, we set  $x = 0.85$  m. Additionally, during the training process, the policy was incentivized to maximize the vertical jump height, reaching a target height of  $z = 0.35$  m above the initial height of the robot. To quantitatively evaluate the performance of the forward jump task, we define the performance error metric as:

$$J_{fj} = |x_f - x_i - 0.85| + |y_f - y_i| + |\max z - z_i - 0.35|,$$

where  $(x_i, y_i, z_i)$  and  $(x_f, y_f, \max z)$  represent the robot's initial and final positions and the maximum height achieved during the jump, respectively. This metric captures the robot's ability to achieve the desired forward displacement while maintaining lateral stability ( $y_f - y_i$ ) and achieving the target vertical jump height (0.35 m).

#### A.1.2 Yaw-Jump

The yaw jump task requires the robot to perform an in-place jump while achieving a specified yaw rotation. For our experiments, the target yaw angle was set to  $\frac{3\pi}{4}$  radians. The performance error metric is defined as:

$$J_{yj} = |\phi_f| + |\theta_f| + |\psi_f - \psi_i - \frac{3\pi}{4}| + |x_f - x_i| + |y_f - y_i|,$$

where  $\phi_f$ ,  $\theta_f$ , and  $\psi_f$  represent the final roll, pitch, and yaw angles in the robot's body frame, respectively,  $\psi_i$  is the initial yaw angle, and  $(x_i, y_i)$  and  $(x_f, y_f)$  denote the robot's initial and final horizontal positions. This metric accounts for the robot's ability to maintain stability in roll and pitch, achieve the desired yaw rotation of  $3\pi/4$  radians, and minimize horizontal drift during the jump.

#### A.1.3 Velocity Tracking

In this task, the policy was trained to track velocity commands consisting of forward velocity ( $v_x$ ), lateral velocity ( $v_y$ ), and angular velocity ( $w_z$ ). To evaluate the policy, we designed a circular trajectory tracking task, where the forward velocity command is varied linearly: it increases from 0.4 m/s to 0.8 m/s and then decreases back to 0.4 m/s. The angular velocity command was adjusted accordingly to achieve a circular trajectory of radius 0.6 m. The performance metric for this task is defined as:

$$J_{vt} = \sqrt{(v_{x,\text{ref}} - v_x)^2 + (v_{y,\text{ref}} - v_y)^2} + 0.5 \cdot |w_{z,\text{ref}} - w_z|, \quad (7)$$

where  $v_{x,\text{ref}}$ ,  $v_{y,\text{ref}}$ , and  $w_{z,\text{ref}}$  are the reference forward, lateral, and angular velocities, and  $v_x$ ,  $v_y$ , and  $w_z$  are the actual tracked velocities. We follow the same definitions for the Humanoid Velocity Tracking task.



#### 538 A.1.4 Attitude Tracking

539 In the attitude tracking task, the policy was trained to achieve commanded roll or pitch angles, all  
 540 defined with respect to the body frame. During evaluation, the task involved tracking a periodic-  
 541 ramp pitch reference signal with a fixed amplitude and frequency, followed by a periodic-ramp roll  
 542 reference signal. The performance metric for this task is defined as:

$$J_{rp} = \sum_{i=1}^N \left\| \begin{bmatrix} \phi_i^{ref} - \phi_i \\ \psi_i^{ref} - \psi_i \end{bmatrix} \right\|_2, \quad (8)$$

543 where  $\phi_i^{ref}$  and  $\psi_i^{ref}$  are the sinusoidal reference signals for roll and pitch, respectively, and  $\phi_i$  and  
 544  $\psi_i$  are the actual tracked roll and pitch angles over the evaluation period.

#### 545 A.2 Implementation Details of SPI

546 The system identification objective is defined by the dynamics model in Eq. (1). The state vector  $\mathbf{x}_t$   
 547 represents the full floating-base and joint state of the robot, defined as

$$\mathbf{x}_t = [\mathbf{p}_t, \mathbf{q}_t, \mathbf{v}_t, \boldsymbol{\omega}_t, \mathbf{q}_{jnt,t}, \dot{\mathbf{q}}_{jnt,t}]$$

548 where  $\mathbf{p}_t \in \mathbb{R}^3$  is the base position,  $\mathbf{q}_t \in \mathbb{R}^4$  is the base orientation represented as a unit quaternion,  
 549  $\mathbf{v}_t \in \mathbb{R}^3$  is the linear velocity of the base,  $\boldsymbol{\omega}_t \in \mathbb{R}^3$  is the angular velocity,  $\mathbf{q}_{jnt,t}$  denotes joint  
 550 positions, and  $\dot{\mathbf{q}}_{jnt,t}$  denotes joint velocities.

551 The system identification cost function Eq.(3) in SPI consists of three components: **Base Prediction**  
 552 **Cost**, which promotes global pose alignment by penalizing errors in the simulated floating-base  
 553 state relative to motion-capture trajectories; **Joint Prediction Cost**, which enforces local dynamic  
 554 consistency by minimizing discrepancies in joint position, velocity, and torque using proprioceptive  
 555 data; and **Parameter Regularization**, which constrains deviations from nominal URDF values for  
 556 physical and motor parameters, including mass, center of mass, inertia, and actuator gains.

557 The actuator model in Eq.(2) employs a hyperbolic-tangent form to approximate torque saturation. It  
 558 preserves undisturbed torque output under small commands while smoothly saturating at the limits,  
 559 ensuring both physical realism and optimization stability.

560 The full set of cost terms and their corresponding coefficients is detailed in Table 3. Coefficients are  
 561 first normalized to yield unit cost on a reference dataset using default parameters, followed by global  
 562 scaling: velocity-related terms are weighted by 0.5, torque-related terms by 0.2, and regularization  
 563 terms by 0.1.

564 The parameter sampling ranges for CMA-ES initialization are detailed in Table 4, where each pa-  
 565 rameter is drawn from a uniform distribution centered at its nominal value specified in the URDF.  
 566 Sampling-based optimization is performed using Optuna [63] with the default CMA-ES optimizer  
 567 with Gaussian sampler, running for 5 iterations.

#### 568 A.3 Implementation Details of SPI-Active

569 The active exploration in Stage-2 of SPI-Active requires us to optimize the input command se-  
 570 quences of a multi-behavioral policy(Section.4). To this end, we follow the training pipeline of [62]  
 571 and pre-train an RL policy whose input commands  $c_t$  is a 14 dimensional vector, given by:

$$c_t = [v_x, v_y, w_z, h, f, b_1, b_2, b_3, b_4, h_f, \phi, \psi, s_w, s_l]^T \quad (9)$$

572 where  $v_x, v_y, w_z$  are the 2D velocity twist commands, and the policy is trained to track these com-  
 573 mands,  $h, f, h_f$  refers the body height, stepping frequency and the foot swing height respectively.  
 574  $b_1, b_2, b_3, b_4$  are the gait behavioral commands, that modify the quadrupedal gait and out of which  
 575  $b_4$  determines the duration of the gait which is kept fixed even during the training phase.  $\phi, \psi$  are  
 576 the body roll and pitch commands, and  $s_w, s_l$  are the commanded stance width and length.

Table 3: **SPI** Cost Function Terms and Coefficients

| Name                              | Expression                                | Coefficient |
|-----------------------------------|-------------------------------------------|-------------|
| Base prediction cost              |                                           |             |
| Position prediction error         | $\ p - p_r\ ^2$                           | 4.0         |
| Velocity prediction error         | $\ v - v_r\ ^2$                           | 2.0         |
| Quaternion prediction error       | $1.0 - \langle q, q_r \rangle^2$          | 2.0         |
| Angular velocity prediction error | $\ \omega - \omega_r\ ^2$                 | 0.5         |
| Joint prediction cost             |                                           |             |
| Joint position prediction error   | $\ q_{jnt} - q_{jnt,r}\ ^2$               | 3.0         |
| Joint velocity prediction error   | $\ \dot{q}_{jnt} - \dot{q}_{jnt,r}\ ^2$   | 0.1         |
| Joint torque prediction error     | $\ \tau - \tau_r\ ^2$                     | 0.01        |
| Parameter regularization          |                                           |             |
| Mass                              | $\ m - m_0\ ^2$                           | 0.01        |
| Center of mass                    | $\ \mathbf{r} - \mathbf{r}_0\ ^2$         | 10.0        |
| Inertia                           | $\ \mathbf{I} - \mathbf{I}_0\ ^2$         | 1.0         |
| Tanh motor gain                   | $\ \kappa_{\tanh} - \kappa_{\tanh,0}\ ^2$ | 0.01        |
| Linear motor gain                 | $\ \kappa_s - \kappa_{s,0}\ ^2$           | 0.1         |

Table 4: Sampling Ranges of Parameters for Different Robots

| Name                                                | Min                   | Max                |
|-----------------------------------------------------|-----------------------|--------------------|
| Go2 (base link)                                     |                       |                    |
| Mass $m$                                            | 3.0                   | 15.0               |
| Inertia diagonal elements $\text{diag}(\mathbf{I})$ | (0.005, 0.005, 0.005) | (1.0, 1.0, 1.0)    |
| Center of mass $\mathbf{r}$                         | (-0.1, -0.1, -0.1)    | (0.1, 0.1, 0.1)    |
| Tanh motor gain $\kappa_{\tanh}$                    | (10.0, 10.0, 10.0)    | (40.0, 40.0, 40.0) |
| Linear motor gain $\kappa_s$                        | 0.5                   | 1.5                |
| G1 (pelvis link)                                    |                       |                    |
| Mass $m$                                            | 1.0                   | 10.0               |
| Inertia diagonal elements $\text{diag}(\mathbf{I})$ | (0.005, 0.005, 0.005) | (1.0, 1.0, 1.0)    |
| Center of mass $\mathbf{r}$                         | (-0.2, -0.2, -0.2)    | (0.2, 0.2, 0.2)    |

577 In order to solve the optimization problem in Equation.5, we need to approximate the value of  
578  $\text{tr}(\mathbf{F}(\theta^*, \pi)^{-1})$  for a given trajectory. Hence, we consider our dynamics equation with a gaussian  
579 noise as given by:

$$\mathbf{x}_{t+1} = f(\mathbf{x}_t, \mathbf{u}_t; \theta) + w_t \quad (10)$$

580 where  $w_t \sim \mathcal{N}(0, \sigma^2 I)$ , then the FIM reduces to:

$$\mathbf{F}(\theta^*, \pi) = \sigma^{-2} \cdot \mathbb{E}_{p(\cdot|\theta^*, \pi)} \left[ \sum_{t=1}^T \frac{\partial f(x_t, u_t; \theta^*)}{\partial \theta} \cdot \left( \frac{\partial f(x_t, u_t; \theta^*)}{\partial \theta} \right)^\top \right] \quad (11)$$

581 Now, given that  $\theta^*$  is not available to us, we instead use a surrogate with  $\hat{\theta}_1$  and given that our sim-  
582 ulators need not be differentiable, we use finite difference approximation to calculate the gradient.  
583 Further, we add a termination penalty to prevent highly aggressive inputs commands that can lead  
584 to fall of the robot.

585 Further, If we want to collect a trajectory of length  $\sim 40s \implies T = 2000$ , to make this optimiza-  
586 tion problem more tractable, we constrain the input space by optimizing only a selected subset of  
587 commands:  $[v_x, v_y, \omega_z, b_1, b_2, \phi, \psi]$  while keeping others fixed. These were chosen for their ability  
588 to sufficiently excite the physical parameters of interest during system identification. It is important  
589 to note that this subset is not fixed and can be adapted based on the specific parameters being tar-  
590 geted in different scenarios. Rather than optimizing these commands at every individual timestep,  
591 we adopt a more compact representation by reparameterizing the command trajectories using a 10-  
592 degree Bézier curve. This reduces the number of optimization variables, as we only sample and  
593 optimize the corresponding control points of the Bézier curve, excluding  $b_1$  and  $b_2$ . The entire com-  
594 mand sequence is divided into segments of fixed time horizons, each of length  $H = 4$  seconds. For

each horizon, the Bézier-defined command profile is resampled to generate the control sequence. For the gait-modulating commands  $b_1$  and  $b_2$ , we select from four discrete combinations:  $(0.5, 0.5)$ ,  $(0.5, 0.0)$ ,  $(0.0, 0.5)$ , and  $(0.0, 0.0)$ , which correspond to pace, trot, bound, and pronk gaits respectively. These gait parameters are held fixed within each horizon to preserve consistent behavioral structure during execution.

#### A.4 Mass-Inertia Matrix Parameterization

The robot’s inertial parameters  $\theta_{in}$  includes: mass  $m \in \mathbb{R}$ , center of mass  $\mathbf{r} \in \mathbb{R}^3$ , and rotational inertia  $\mathbf{I} \in S_3$  (the set of  $3 \times 3$  symmetric matrices). These parameters are physically feasible if and only if the pseudo-inertia  $\mathbf{J}(\theta_{in})$  is positive definite [64]:  $\mathbf{J}(\theta_{in}) = \begin{bmatrix} \boldsymbol{\Sigma} & \mathbf{h} \\ \mathbf{h}^T & m \end{bmatrix} \succ 0$ , where  $\mathbf{h} = m \cdot \mathbf{r}$ ,  $\boldsymbol{\Sigma} = \frac{1}{2}tr(\mathbf{I})\mathbb{I}_{3 \times 3} - \mathbf{I}$ , and  $\mathbf{I}_{3 \times 3}$  is the identity matrix. To ensure that these physical constraints are satisfied, we project the mass-inertia matrix  $\mathbf{J}$  into a log-Cholesky form [65] that is feasible with respect to the positive-definite constraints.

#### A.5 Implementation details for Training Downstream Tasks

The training pipeline for all the downstream tasks uses the code framework inspired from [66]. We first mention the commonalities and then report the task specific rewards, observations and details.

For each task, we formulate it as a goal-conditioned Reinforcement learning (RL) task, where the policy  $\pi$  is trained to achieve a task and motivated to reduce the performance metrics in Appendix A.1. Each policy is conditioned by observations  $o_t$  and it outputs action  $a_t \in \mathbb{R}^{12}$  for the quadruped and  $a_t \in \mathbb{R}^{15}$  for the humanoid, where the policy provides actions only to the lower body and the upper body joints are fixed. These actions correspond to the target joint positions and is passed to a PD controller that actuates the robot’s degrees of freedom. The policy uses PPO [59] to maximize cumulative discounted reward. Further, we follow an asymmetric actor-critic training [40] to train the actor with only easily available observations from proprioception and other time based observations, while the critic has access to privileged information like base linear velocity which is usually difficult to estimate with on-board sensors.

##### A.5.1 Observations

All the policies use the robot’s proprioception  $s_t^p$  and some task specific observations. The *Forward Jump* and *Yaw Jump* use a time phase variable  $\Phi$  [67] to motivate the position of feet contacts to produce jump. The summary of observations are reported in Table 5

Table 5: Observation Space for RL Policy

| Component                                      | Description                                                       |
|------------------------------------------------|-------------------------------------------------------------------|
| <i>Common Observations (used in all tasks)</i> |                                                                   |
| $\omega_t^{\text{base}}$                       | Base angular velocity                                             |
| $\mathbf{g}_t$                                 | Gravity vector projected in base frame                            |
| $\mathbf{q}_t$                                 | Joint positions                                                   |
| $\dot{\mathbf{q}}_t$                           | Joint velocities                                                  |
| $\mathbf{a}_t$                                 | Last applied actions                                              |
| <i>Task-Specific Observations</i>              |                                                                   |
| <b>Forward &amp; Yaw Jump</b>                  | $\Phi$ (phase), $\mathbf{a}_{t-1}$ (last-last action)             |
| <b>Velocity Tracking</b>                       | $v_{\text{cmd}}^x, v_{\text{cmd}}^y, \omega_{\text{cmd}}^z$       |
| <b>Attitude Tracking</b>                       | $\phi_{\text{cmd}}(\text{roll}), \psi_{\text{cmd}}(\text{pitch})$ |
| <b>Humanoid Velocity Tracking</b>              | $\Phi$ (phase), $q^{\text{refupper}}$ (upperbody dof reference)   |

### 624 A.5.2 Rewards

625 We summarize the weights of all reward terms used in tasks during policy training and evaluation.  
626 Quadruped task rewards are detailed in Table 6, covering different locomotion and agility objectives  
627 including block jumping, yaw jumping, tracking, and agile movement. Humanoid task rewards are  
628 shown in Table 7, with emphasis on gait stabilization, symmetry, and whole-body coordination.

Table 6: Reward terms for quadruped tasks

| Term                                  | Block Jump | Yaw Jump | Roll/Pitch Track | Agile Loco |
|---------------------------------------|------------|----------|------------------|------------|
| <b>Task Reward</b>                    |            |          |                  |            |
| Body position                         | 2.0        | 2.0      | –                | –          |
| Body orientation                      | –          | 2.0      | 3.0              | –          |
| Body linear velocity                  | –          | –        | –                | 2.0        |
| Body angular velocity                 | –          | –        | –                | 1.0        |
| Feet height                           | 3.0        | 3.0      | –                | –          |
| <b>Penalties &amp; Regularization</b> |            |          |                  |            |
| Action rate                           | –1e-3      | –1e-3    | –1e-3            | –1e-2      |
| Slippage                              | –3.0       | –3.0     | –1e-1            | –          |
| In-air contact                        | –3.0       | –3.0     | –                | –          |
| Foot spacing                          | –2.5       | –2.5     | –0.5             | –          |
| Non-foot contact                      | –          | –0.3     | –                | –1e-1      |
| Torque penalty                        | –          | –        | –2e-4            | –2e-4      |
| Acceleration penalty                  | –          | –        | –2.5e-7          | –2.5e-7    |
| Velocity penalty                      | –          | –        | –1e-4            | –1e-4      |
| Symmetry bonus                        | 2.0        | 2.0      | –                | –          |
| Base-height reference                 | –          | –        | 1.0              | 2.0        |
| Joint-limit violation                 | –          | –        | –10.0            | –10.0      |

Table 7: Reward terms for humanoid velocity tracking

| Term                                  | Weight | Term                      | Weight  |
|---------------------------------------|--------|---------------------------|---------|
| <b>Task Reward</b>                    |        |                           |         |
| Linear-velocity tracking              | 1.0    | Angular-velocity tracking | 1.0     |
| Waist-joint tracking                  | 0.5    |                           |         |
| <b>Penalties &amp; Regularization</b> |        |                           |         |
| Action-rate                           | –0.1   | Vertical-vel              | –2.0    |
| Lateral-ang-vel                       | –0.05  | Orientation               | –1.5    |
| Torque                                | –1e-5  | Acceleration              | –2.5e-7 |
| Velocity                              | –1e-3  | Contact-no-vel            | –0.2    |
| Feet-orientation                      | –2.0   | Close-feet                | –10.0   |
| Joint-limit violation                 | –5.0   | Base-height reference     | –10.0   |
| Contact                               | –0.20  | Feet-heading alignment    | –0.25   |
| Hip-position                          | –1.0   | Stance-tap                | –5.0    |
| Stance-root                           | –5.0   | Stance-symmetry           | –0.5    |
| Survival (“alive”)                    | 0.15   | Contact bonus             | 0.18    |

### 629 A.5.3 Domain Randomization

630 We use two Domain Randomization ranges. The nominal range, that is used by the vanilla baseline,  
631 **SPI** and **SPI-Active**. However it should be noted that the motor parameter ranges  $\kappa_{\text{Hip}}$ ,  $\kappa_{\text{Thigh}}$ ,  $\kappa_{\text{Calf}}$

632 corresponding to the Hip, Thigh and Calf are not used for the vanilla baseline. Second, we have the  
633 Heavy Range, where the ranges are almost double compared to the nominal range and is used by the  
634 *Heavy DR* baseline. The exact ranges are summarized in Table 8

| Table 8: Domain Randomization Ranges |                                                   |                           |
|--------------------------------------|---------------------------------------------------|---------------------------|
| Term                                 | Nominal Range                                     | Heavy Range               |
| Dynamics Randomization               |                                                   |                           |
| Friction                             | $\mathcal{U}(0.5, 1.0)$                           | $\mathcal{U}(0.5, 1.0)$   |
| Base CoM offset(m)                   | $\mathcal{U}(-0.1, 0.1)$                          | $\mathcal{U}(-0.2, 0.2)$  |
| Base mass( $\times$ default)Kgs      | $\mathcal{U}(0.8, 1.2)$                           | $\mathcal{U}(0.6, 1.4)$   |
| Base Inertia offset( $Kgm^2$ )       | $\mathcal{U}(-0.05, 0.05)$                        | $\mathcal{U}(-0.05, 0.3)$ |
| $\kappa_{Hip}$                       | $\mathcal{U}(22, 24)$                             | -                         |
| $\kappa_{Thigh}$                     | $\mathcal{U}(24, 26)$                             | -                         |
| $\kappa_{Calf}$                      | $\mathcal{U}(22, 24)$                             | -                         |
| Term                                 | Value                                             |                           |
| Common Ranges                        |                                                   |                           |
| P Gain                               | $\mathcal{U}(0.9, 1.1)$                           |                           |
| D Gain                               | $\mathcal{U}(0.9, 1.1)$                           |                           |
| Torque RFI                           | $0.1 \times \text{torque limit N} \cdot \text{m}$ |                           |

## 635 A.6 Parameter Identification Result Analysis

636 We evaluate the identified physical and actuator parameters of the Go2 robot with a 4.7kg payload  
637 mounted at the lower rear side of the base. The Table 9 compares the identified values against the  
638 default parameters without payload.

639 The identified model captures key physical changes introduced by the 4.7, kg rear-mounted payload.  
640 The estimated mass increases by approximately 2.44, kg, partially compensating for the added load.  
641 The center of mass shifts rearward and downward, consistent with the payload’s mounting location,  
642 and is essential for accurate contact force modeling and stability. Among the inertial parameters, we  
643 observe a reasonable increase in  $\mathbf{I}_{zz}$ , likely resulting from the added mass distribution around the  
644 yaw axis. However, the increases in  $\mathbf{I}_{xx}$  and  $\mathbf{I}_{yy}$  are unexpectedly large and not fully supported by  
645 the payload geometry. This suggests possible overfitting or parameter coupling due to insufficient  
646 excitation in the pitch and roll directions—an inherent challenge for quadruped systems. Nonethe-  
647 less, the identified parameters yield improved trajectory prediction and real-world policy transfer  
648 performance, indicating that the model captures useful aspects of the true dynamics.

649 The actuator tanh gains reveal strong saturation effects at high-torque range. With gains around  
650 25 for the thigh and calf joints, torque output saturates more gradually, resulting in a 20 – 26%  
651 reduction near the maximum torque limits. Modeling this nonlinearity is critical for improving  
652 sim-to-real fidelity in high-torque tasks such as dynamic locomotion and jumping with payloads.

Table 9: Comparison of Default and Identified Parameters of Go2

| Setting | Mass  | CoM <sub>x</sub> | CoM <sub>y</sub> | CoM <sub>z</sub> | $\mathbf{I}_{xx}$ | $\mathbf{I}_{yy}$ | $\mathbf{I}_{zz}$ | $\kappa_{Hip}$ | $\kappa_{Thigh}$ | $\kappa_{Calf}$ |
|---------|-------|------------------|------------------|------------------|-------------------|-------------------|-------------------|----------------|------------------|-----------------|
| Default | 6.921 | 0.021            | 0.000            | -0.005           | 0.025             | 0.098             | 0.107             | —              | —                | —               |
| Payload | 9.363 | 0.004            | -0.005           | -0.020           | 0.391             | 0.515             | 0.396             | 22.553         | 24.969           | 23.523          |

## 653 A.7 Attitude Tracking Results

654 Figure 6 shows pitch tracking performance in an attitude control task, emphasizing the sim-to-real  
655 consistency of SPI-Active policies. The SPI-Active policy (left) exhibits a trajectory that closely  
656 matches the simulated response, whereas the vanilla policy (right) shows larger deviations from  
657 simulation. This demonstrates that SPI-Active achieves a smaller sim-to-real gap.



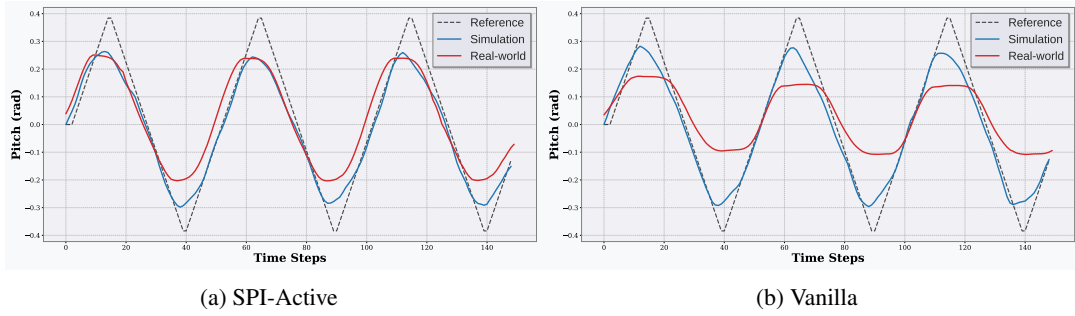

Figure 6: Open-loop attitude tracking results. Comparison between SPI-Active and vanilla policies in both simulation and real-world execution. SPI-Active yields a closer match to simulation, suggesting improved sim-to-real consistency.
